# Supplementary material
Source: PubMed Central journal article supplement (PMC6442333)
Supplement: ASN.2018070687SupplementaryData1.pdf [file ASN.2018070687SupplementaryData1.pdf]

## Supplemental information

### DNMT1 in *Six2* progenitor cells is essential for transposable element silencing and kidney development

\*Szu-Yuan Li<sup>1,2,3,4</sup>, \*Jihwan Park<sup>1,2</sup>, \*Yuting Guan<sup>1,2</sup>, Kiwung Chung<sup>1,2</sup>, Rojesh Shrestha<sup>1,2</sup>, Matthew B Palmer<sup>5</sup>, Katalin Susztak<sup>1,2</sup>

#### Table of Contents

Figure S1. Transcription factor motif enrichment analysis of DMRs.

Figure S2. Gross morphology of *Dnmt1<sup>f/f</sup>* and *Six2<sup>Cre</sup> Dnmt1<sup>f/f</sup>* mice.

Figure S3. Immunofluorescence staining of CCND1 in *Dnmt1<sup>f/f</sup>* and *Six2<sup>Cre</sup> Dnmt1<sup>f/f</sup>* kidneys.

Figure S4. Expression of proximal tubule markers in *Dnmt1<sup>f/f</sup>* and *Six2<sup>Cre</sup> Dnmt1<sup>f/f</sup>* kidneys.

Figure S5. Immunofluorescence staining of SIX2 in *Dnmt1<sup>f/f</sup>* and *Six2<sup>Cre</sup> Dnmt1<sup>f/f</sup>* kidneys.

Figure S6. Heatmap of representative target genes showing gene expression differences.

Figure S7. Gene expression patterns in *Dnmt1<sup>f/f</sup>* and *Six2<sup>Cre</sup> Dnmt1<sup>f/f</sup>* mice.

Figure S8. Transcription factor motif enrichment analysis of DMRs.

Figure S9. Representative DMRs and their target gene expression changes.

Figure S10. Functional annotation analysis (DAVID)

Figure S11. KEGG pathways for RIG-I-like receptor signaling pathway and P53 signaling pathway.

Table S1. Primer sequences used in this study.

Table S2. List of differentially expressed genes between P0 kidneys of *Dnmt1* knock-out mice and controls.

Table S3. List of differentially expressed transposable elements between P0 kidneys of *Dnmt1* knock-out mice and controls.

### TF motifs for hyper-DMR in adult

|                                                                                   | Name  | P-value | # Target Sequences with Motif | % of Targets Sequences with Motif |
|-----------------------------------------------------------------------------------|-------|---------|-------------------------------|-----------------------------------|
|  | Hoxc9 | 1e-47   | 309.0                         | 7.42%                             |
|  | Lhx2  | 1e-22   | 464.0                         | 11.14%                            |
|  | Lhx3  | 1e-19   | 680.0                         | 16.32%                            |
|  | Cdx2  | 1e-18   | 286.0                         | 6.86%                             |
|  | Pdx1  | 1e-18   | 405.0                         | 9.72%                             |

### TF motifs for hypo-DMR in adult

|                                                                                   |              |       |       |        |
|-----------------------------------------------------------------------------------|--------------|-------|-------|--------|
|  | HNF4a        | 1e-34 | 356.0 | 8.52%  |
|  | NF1(CTF)     | 1e-29 | 303.0 | 7.25%  |
|  | Hnf1         | 1e-23 | 93.0  | 2.23%  |
|  | Tlx          | 1e-12 | 267.0 | 6.39%  |
|  | NF1-halfsite | 1e-11 | 926.0 | 22.16% |

**Figure S1. Transcription factor motif enrichment analysis of DMRs.** TF motifs enriched in DMRs between P0 and adult mouse kidneys.

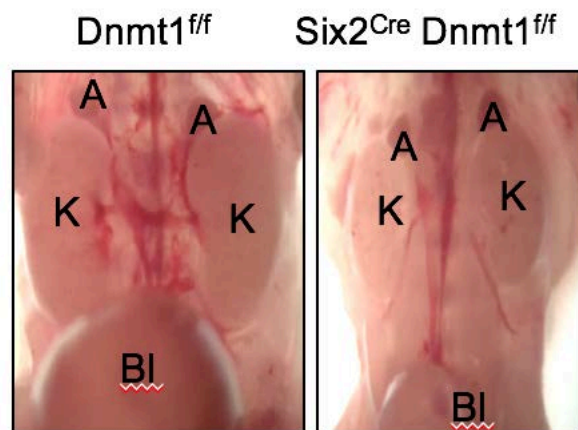

**Figure S2. Gross morphology of *Dnmt1<sup>f/f</sup>* and *Six2<sup>Cre</sup> Dnmt1<sup>f/f</sup>* mice.** Urinary bladder: UB, kidney: K and adrenal: A

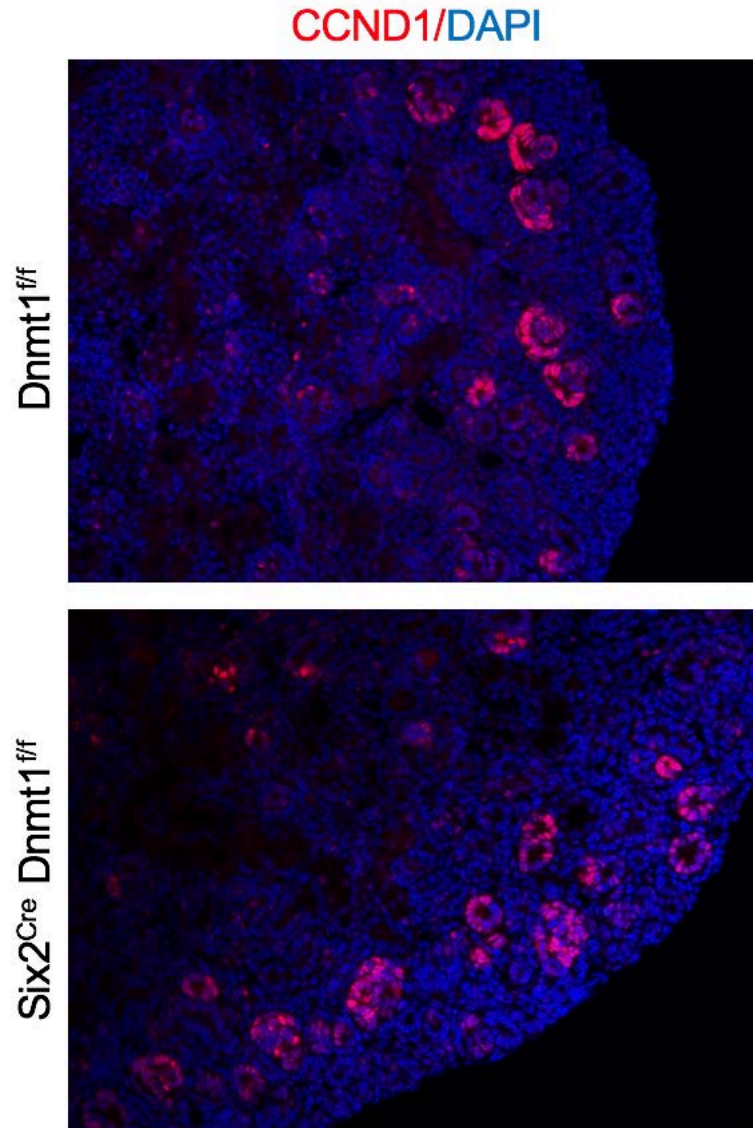

**Figure S3. Immunofluorescence staining of CCND1 in *Dnmt1<sup>f/f</sup>* and *Six2<sup>Cre</sup> Dnmt1<sup>f/f</sup>* kidneys.**

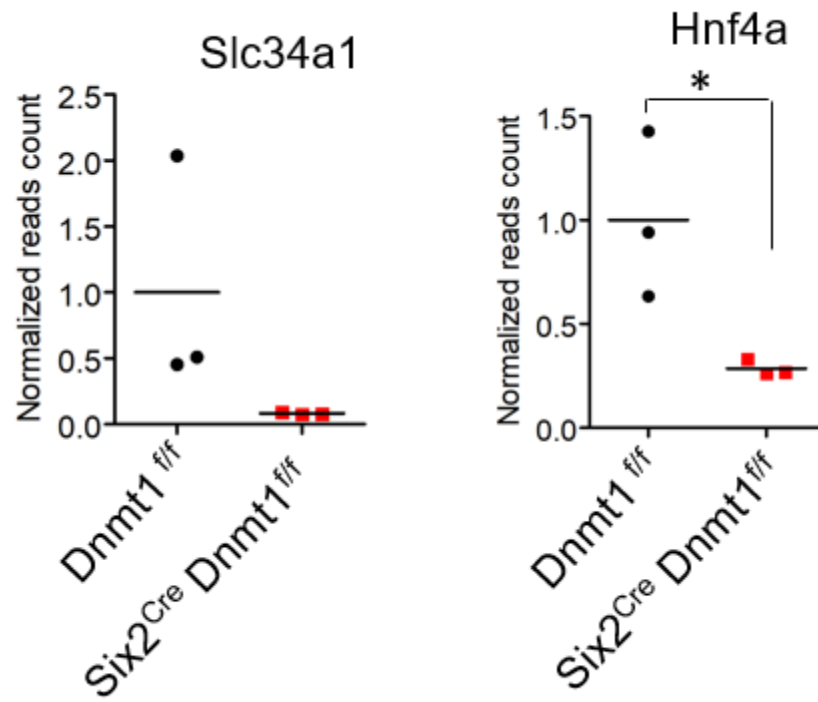

Figure S4. Expression of proximal tubule markers in *Dnmt1<sup>fl/fl</sup>* and *Six2<sup>Cre</sup> Dnmt1<sup>fl/fl</sup>* kidneys.

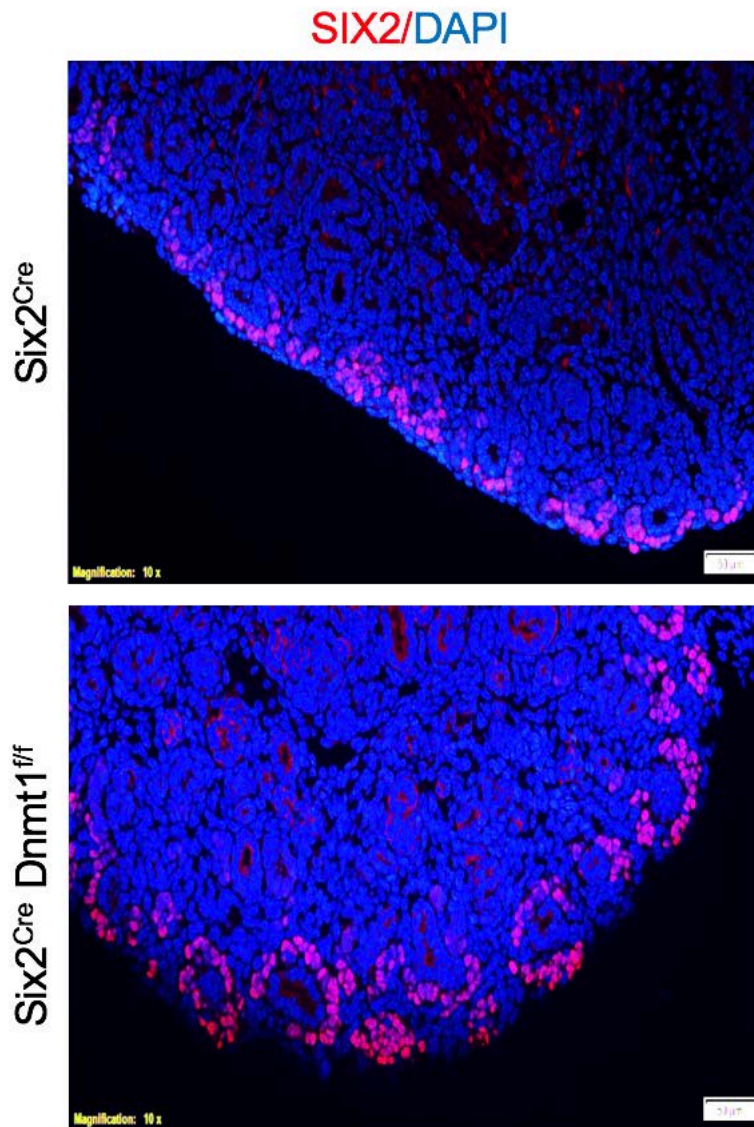

**Figure S5. Immunofluorescence staining of SIX2 in *Dnmt1<sup>fl/fl</sup>* and *Six2<sup>Cre</sup> Dnmt1<sup>fl/fl</sup>* kidneys.**

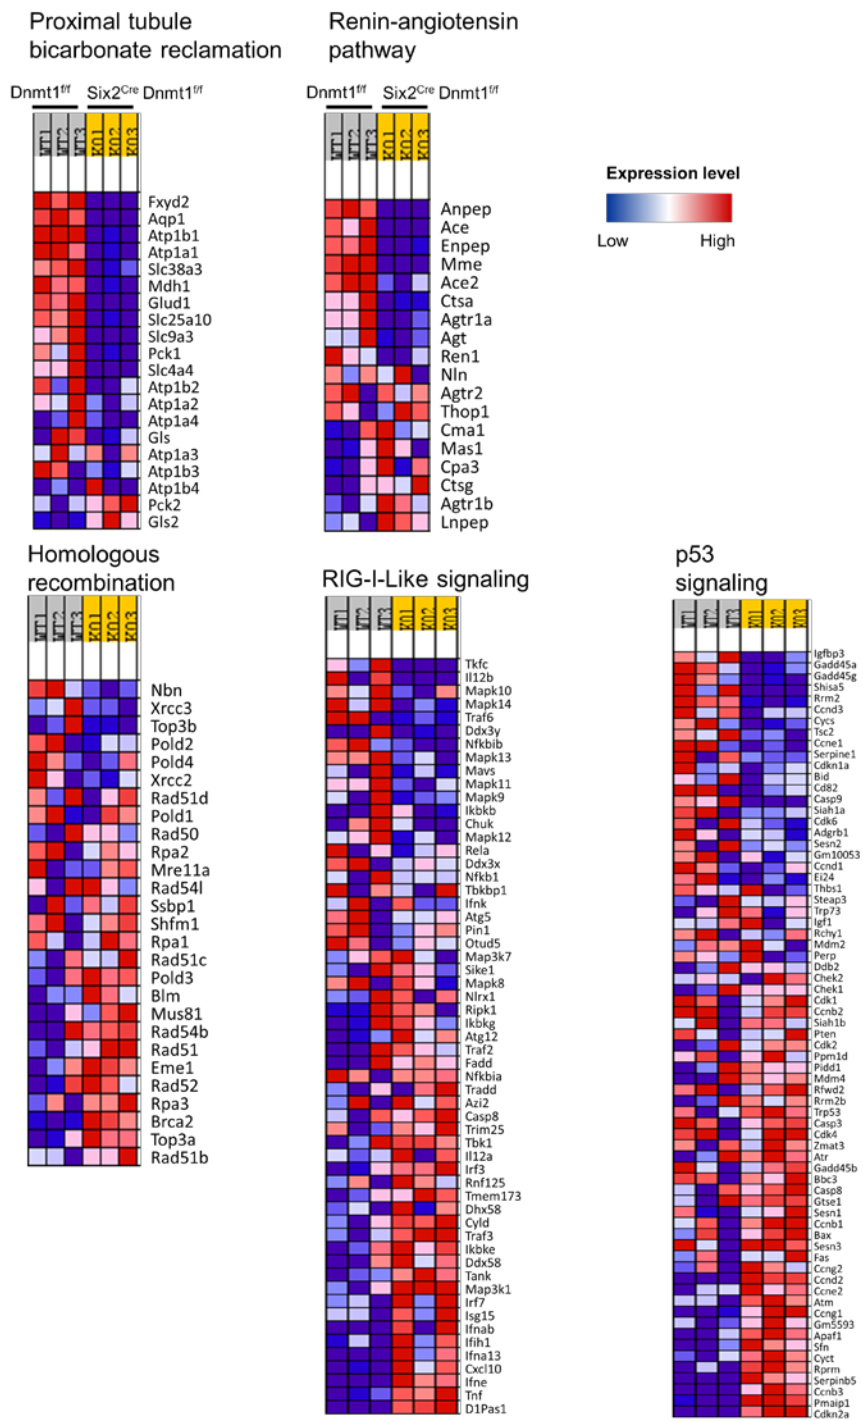

**Figure S6. Heatmap of representative target genes showing gene expression differences.** Gene set enrichment analysis of *Dnmt1<sup>fl/fl</sup>* and *Six2<sup>Cre</sup> Dnmt1<sup>fl/fl</sup>* mice showing expression of selected pathway genes.

**A**

|         | Dnmt1 <sup>fl/fl</sup> |      |      | Six2 <sup>Cre</sup> Dnmt1 <sup>fl/fl</sup> |       |       | Dnmt1 <sup>fl/fl</sup> |        |        | Six2 <sup>Cre</sup> Dnmt1 <sup>fl/fl</sup> |       |        |        |
|---------|------------------------|------|------|--------------------------------------------|-------|-------|------------------------|--------|--------|--------------------------------------------|-------|--------|--------|
|         | WT1                    | WT2  | WT3  | KO1                                        | KO2   | KO3   |                        |        |        |                                            |       |        |        |
| Dazl    | 0.00                   | 0.04 | 0.03 | 15.05                                      | 13.81 | 22.87 | Acy3                   | 59.37  | 30.82  | 28.88                                      | 10.92 | 11.80  | 12.11  |
| Sohlh2  | 0.00                   | 0.00 | 0.01 | 10.19                                      | 10.72 | 14.59 | Atp1b1                 | 235.00 | 225.77 | 224.48                                     | 72.11 | 95.28  | 70.22  |
| Zscan4b | 0.00                   | 0.00 | 0.00 | 8.93                                       | 5.99  | 10.69 | Fxyd2                  | 598.23 | 528.90 | 834.44                                     | 77.67 | 100.47 | 104.34 |
| Zscan4d | 0.02                   | 0.00 | 0.00 | 17.46                                      | 11.34 | 23.32 | Angpt2                 | 6.74   | 7.78   | 4.56                                       | 1.87  | 2.38   | 3.10   |
| Asz1    | 0.01                   | 0.00 | 0.01 | 0.59                                       | 0.74  | 0.96  | Ace                    | 26.29  | 16.63  | 34.47                                      | 4.67  | 5.84   | 4.87   |
| Tcstv1  | 0.00                   | 0.00 | 0.00 | 5.08                                       | 8.65  | 7.51  | Pck1                   | 42.29  | 23.31  | 88.11                                      | 3.57  | 7.97   | 6.99   |
| Tcstv3  | 0.00                   | 0.00 | 0.00 | 11.46                                      | 10.74 | 13.54 | Slc23a1                | 13.40  | 11.00  | 29.87                                      | 2.62  | 2.52   | 2.75   |
| tex19.1 | 0.00                   | 0.01 | 0.00 | 4.06                                       | 3.89  | 5.00  | Slc3a1                 | 31.44  | 27.85  | 46.04                                      | 4.42  | 5.43   | 6.48   |
| Rhox2d  | 0.00                   | 0.00 | 0.03 | 1.51                                       | 1.33  | 1.98  | Umod                   | 84.81  | 100.35 | 120.93                                     | 3.65  | 5.17   | 4.77   |
| Rhox5   | 0.28                   | 0.15 | 0.02 | 10.29                                      | 8.75  | 14.73 | Slc38a3                | 3.55   | 4.38   | 5.61                                       | 1.23  | 1.58   | 1.99   |
| Rhox9   | 0.00                   | 0.00 | 0.00 | 0.12                                       | 0.05  | 0.14  |                        |        |        |                                            |       |        |        |
| Pet2    | 0.00                   | 0.00 | 0.00 | 1.94                                       | 1.86  | 2.13  |                        |        |        |                                            |       |        |        |

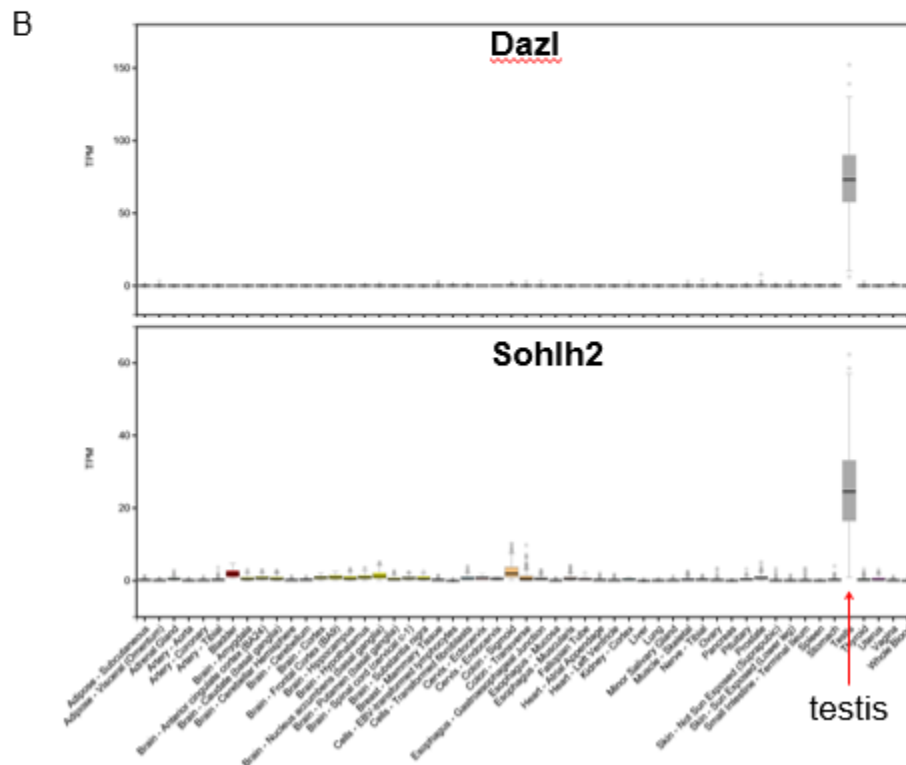

**Figure S7. Gene expression patterns in *Dnmt1<sup>fl/fl</sup>* and *Six2<sup>Cre</sup> Dnmt1<sup>fl/fl</sup>* mice.** (A) RNA sequencing FPKM of gene expression in *Dnmt1<sup>fl/fl</sup>* and *Six2<sup>Cre</sup> Dnmt1<sup>fl/fl</sup>* mice. FPKM stands for Fragments Per Kilobase of transcript per Million mapped reads. (B) Transcript level of *Dazl* and *Sohlh2* in different human tissue samples. Data is from GTEx Analysis Release V7.



### TF motifs for hypo-DMR in *Six2*<sup>Cre</sup> *Dnmt1*<sup>f/f</sup>

|                                                                                   | Name        | P-value | # Target Sequences with Motif | % of Targets Sequences with Motif |
|-----------------------------------------------------------------------------------|-------------|---------|-------------------------------|-----------------------------------|
|  | Mef2c(MADS) | 1e-51   | 1965.0                        | 4.36%                             |
|  | Elk4(ETS)   | 1e-34   | 4671.0                        | 10.37%                            |
|  | Gata2(Zf)   | 1e-30   | 3298.0                        | 7.32%                             |
|  | Gata1(Zf)   | 1e-28   | 2931.0                        | 6.51%                             |
|  | Gata4(Zf)   | 1e-27   | 4988.0                        | 11.08%                            |
|  | Gata3(Zf)   | 1e-15   | 7241.0                        | 16.08%                            |

**Figure S8. Transcription factor motif enrichment analysis of DMRs.** TF motifs enriched in hypo-DMRs between *Dnmt1*<sup>f/f</sup> and *Six2*<sup>Cre</sup> *Dnmt1*<sup>f/f</sup> mouse kidneys.



A

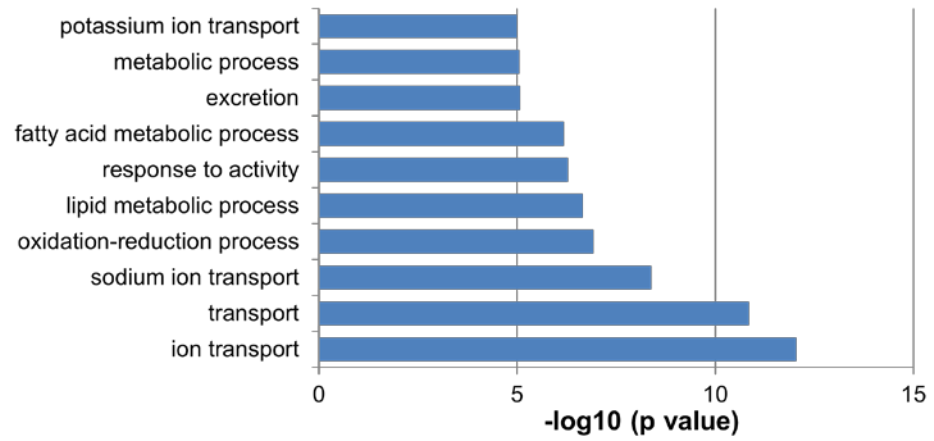

B

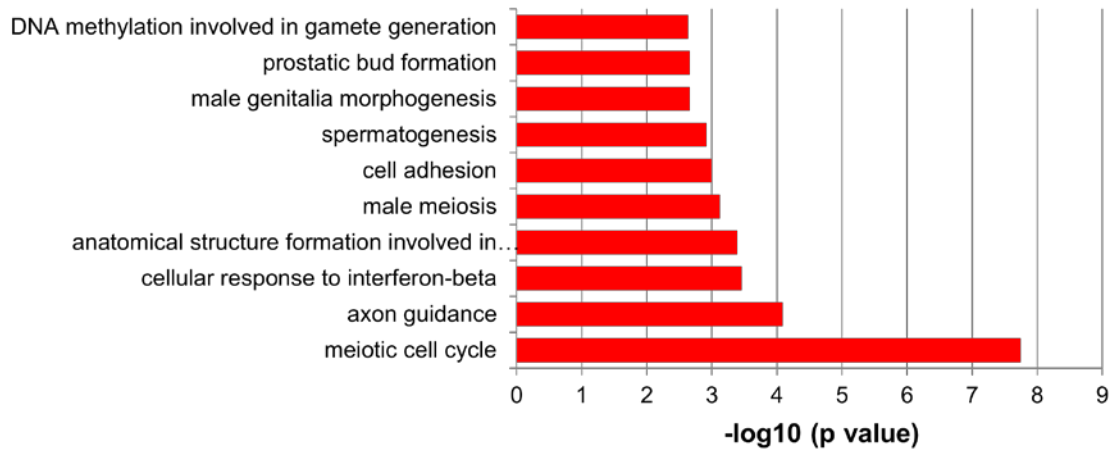

**Figure S10. Functional annotation analysis (DAVID).** Functional annotation analysis of down- (A) and down-regulated genes (B) in between *Dnmt1<sup>f/f</sup>* and *Six2<sup>Cre</sup> Dnmt1<sup>f/f</sup>* mice.

## RIG-I-like receptor signaling pathway

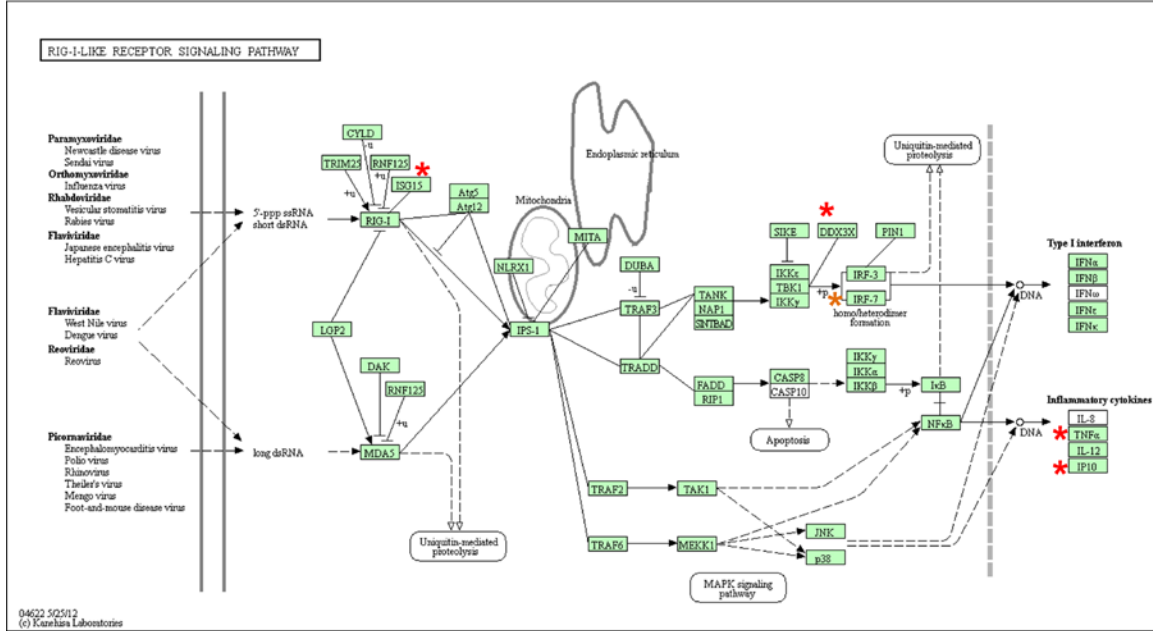

## p53 signaling pathway

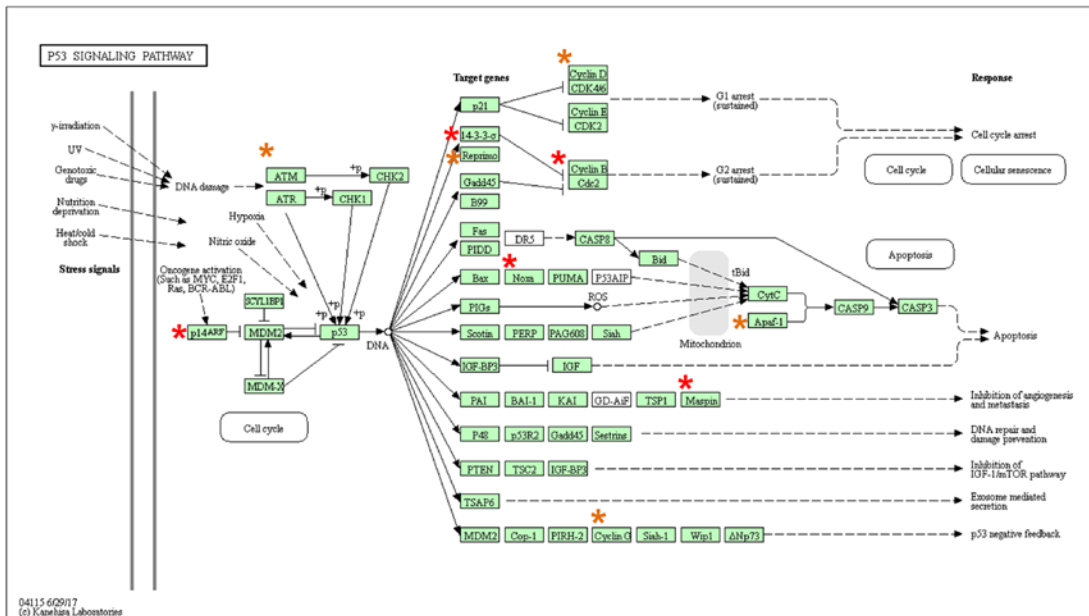

Adjusted p value < 0.05 \* Fold change > 2 \* Fold change > 1.5

**Figure S11. KEGG pathways for RIG-I-like receptor signaling pathway and P53 signaling pathway.** Differentially expressed genes in between *Dnmt1*<sup>f/f</sup> and *Six2*<sup>Cre</sup> *Dnmt1*<sup>f/f</sup> mice are marked by asterisks.

| Target gene | Strand | Sequence                  |
|-------------|--------|---------------------------|
| Dnmt1       | F      | ATAAGAAACGCAGAGTTGTAGACAC |
|             | R      | GGTCCCCGCTGTTACCTC        |
| Dnmt3a      | F      | CAGCTGCTTACGCCCCACCC      |
|             | R      | CACCAGCCGCTCCCTTGTGC      |
| Dnmt3b      | F      | GAACCATTTGTTGGAATTGGG     |
|             | R      | CATGTGCAGTGCCAGTTTTT      |
| Tet1        | F      | CAAATGACAGCACAACCGCAGCT   |
|             | R      | CTGCCCTTGCTGAAGGTGCCTC    |
| Tet2        | F      | CCACGCCACCAAGGCTGAG       |
|             | R      | GGCCGGTGTGTCCAGCAGAC      |
| Tet3        | F      | TGGAGCCTGGACACACAGTA      |
|             | R      | TGTGTTGGTTGTAGAGGGCA      |
| Nephrin     | F      | CCATGGGGAGCTGAAGAATA      |
|             | R      | CCGAGTCCAAACCAAGATGT      |
| Aqp1        | F      | AAGTGGCAAGGAAGGGACAG      |
|             | R      | GGAAGGCTGTGTGTGTGAA       |
| Aqp2        | F      | CGCTCCTTTTCGTCTTCTTT      |
|             | R      | ACAGTCACAGCAGGGTTGAT      |
| Six2        | F      | CACCTCCACAAGAATGAAAGCG    |
|             | R      | CTCCGCCTCGATGTAGTGC       |
| Cited1      | F      | AACCTTGGAGTGAAGGATCGC     |
|             | R      | GTAGGAGAGCCTATTGGAGATGT   |
| Umod        | F      | GGATGCTGCTGGTAATGATGG     |
|             | R      | GAACACCGTCTCGCTTCTGT      |
| Slc12a3     | F      | ACACGGCAGCACCTTATACAT     |
|             | R      | GAGGAATGAATGCAGGTCAGC     |

**Table S1. Primer sequences used in this study.**

**Table S2. List of differentially expressed genes between P0 kidneys of Dnmt1 knock-out mice and controls.**

Please find it in the xls file.

**Table S3. List of differentially expressed transposable elements between P0 kidneys of Dnmt1 knock-out mice and controls.**

Please find it in the xls file.
